# Supplementary material for: A Silicon Sub-Bandgap Near-Infrared Photodetector with High Detectivity Based on Textured Si/Au Nanoparticle Schottky Junctions Covered with Graphene Film
Source: MDPI journal article supplement (doi:10.3390/s23136184), 2023-07-06
Supplement: s1 [file s1]

## Supplementary Information

# A Silicon Sub-bandgap Near-Infrared Photodetector with High Detectivity Based on Textured Si/Au Nanoparticle Schottky Junctions Covered with Graphene Film

Xiyuan Dai <sup>1</sup>, Li Wu <sup>1</sup>, Kaixin Liu <sup>1</sup>, Fengyang Ma <sup>1</sup>, Yanru Yang <sup>1</sup>, Liang Yu <sup>1</sup>, Jian Sun <sup>1,2,\*</sup>  
and Ming Lu <sup>1,2,\*</sup>

<sup>1</sup> Department of Optical Science and Engineering, and Shanghai Ultra-Precision Optical Manufacturing Engineering Center, Fudan University, Shanghai 200433, China; 20110720001@fudan.edu.cn (X.D.); 21110720018@m.fudan.edu.cn (L.W.); 21210720009@m.fudan.edu.cn (K.L.); 22110720009@m.fudan.edu.cn (F.M.); 22210720005@m.fudan.edu.cn (Y.Y.); 21210720284@m.fudan.edu.cn (L.Y.)

<sup>2</sup> Yiwu Research Institute, Fudan University, Yiwu 322000, China

\* Correspondence: jsun@fudan.edu.cn (J.S.); minglu55@fudan.edu.cn (M.L.)

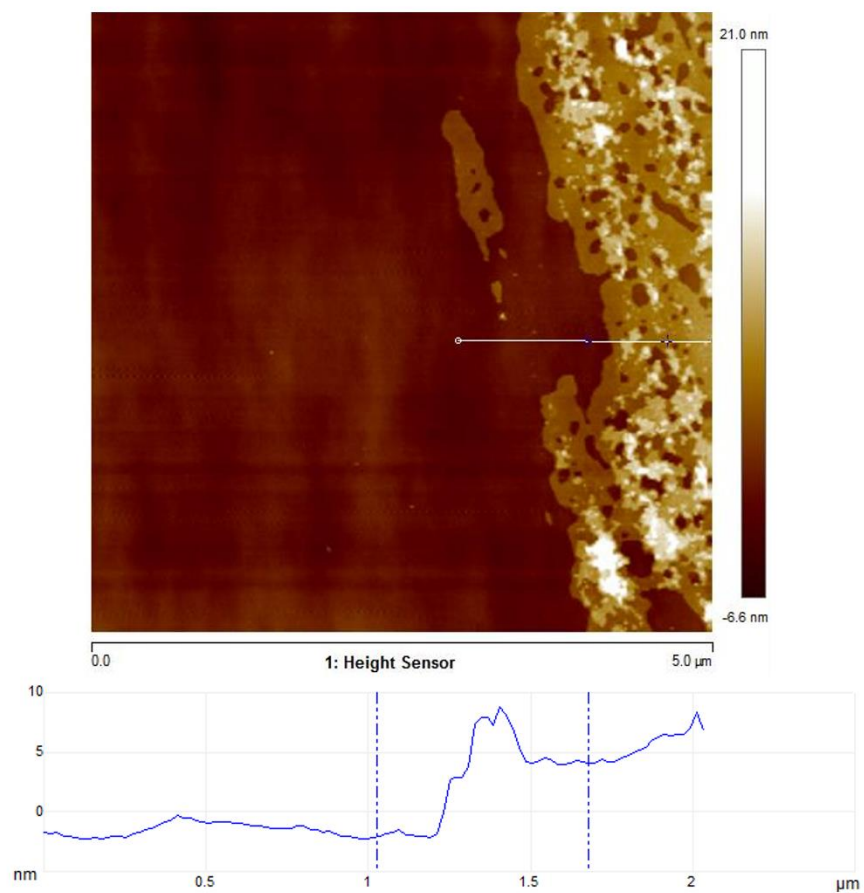

**Figure S1.** AFM image of the graphene film spin-coated on the planar Si.

A step was made to obtain the thickness of graphene film.

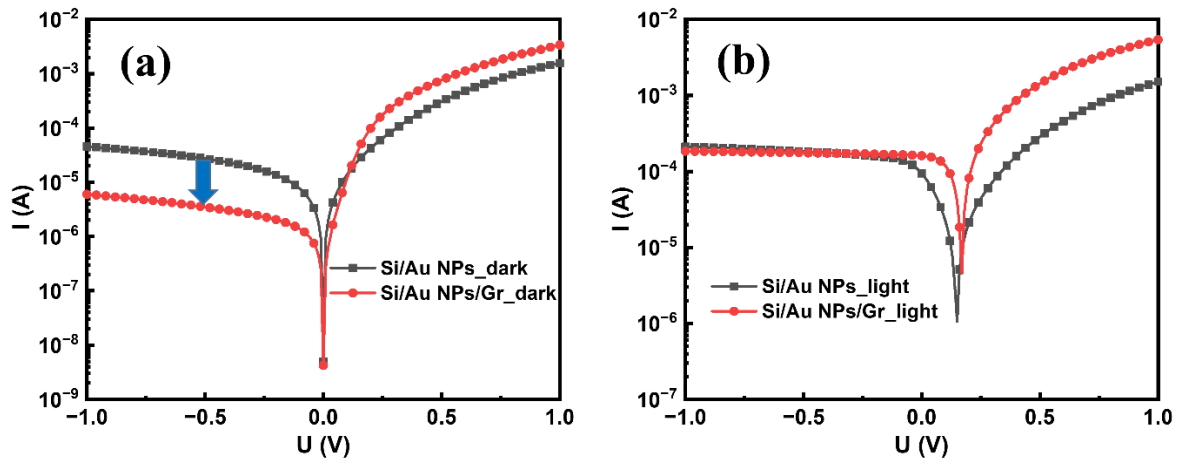

**Figure S2.** I-V characteristics of planar Si/Au NPs and planar Si/Au NPs/Gr PD under dark condition (a) and 1319 nm light illumination with incident power of 0.1 W (b).

To verify the role of Gr film, PDs based on the planar Si were fabricated. The dark current under reverse bias was reduced and responsivity at 0 V increased from 0.9 mA/W to 1.6 mA/W after introducing Gr film. These results show the reproducibility of Gr-induced better performance.

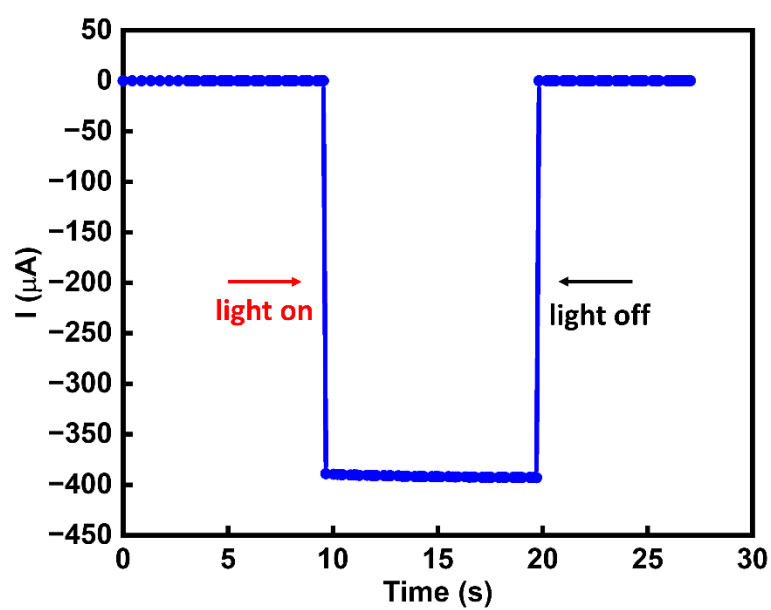

**Figure S3.** Photoresponse of Si/Au NPs/Gr PD device working at zero bias and  $-60\text{ }^{\circ}\text{C}$  under 0.1 W 1319 nm light illumination.
